# Supplementary material for: The Role of Catalase C262T Gene Polymorphism in the Susceptibility and Survival of Cancers
Source: PubMed Central journal article supplement (PMC4880922; doi:10.1038/srep26973), 2016-05-26
Supplement: srep26973-s1.pdf [file srep26973-s1.pdf]

# **The Role of Catalase C-262T Gene Polymorphism in the Susceptibility and Survival of Cancers**

Running head: Catalase C-262T polymorphism and cancer

Cheng-Di Wang<sup>1,#</sup>, Yan Sun<sup>2,#</sup>, Nan Chen<sup>2,#</sup>, Lin Huang<sup>2</sup>, Jing-Wen Huang<sup>2</sup>, Min Zhu<sup>1</sup>, Ting

Wang<sup>1</sup>, Yu-Lin Ji<sup>1\*</sup>

*<sup>1</sup>Department of Respiratory and Critical Care Medicine, West China Medical School/West China Hospital, Sichuan University, Chengdu, Sichuan Province 610041, PR China*

*<sup>2</sup>West China School of Medicine/West China Hospital, Sichuan University, Chengdu, Sichuan 610041, PR China*

**\*Corresponding author:** Yu-Lin Ji

**Address:** Department of Respiratory and Critical Care Medicine, West China Medical School/West China Hospital, Sichuan University, No. 37 Guo Xue Alley, Chengdu, Sichuan Province. **Post Code:** 610041, PR China. **Tel:** +86 28 85422571; **Fax:** +86 28 85422571;

**E-mail:** [jiyulinscu@sina.cn](mailto:jiyulinscu@sina.cn)

<sup>#</sup>These authors contributed equally to this work.

Supplementary Table. 1 Genotype frequency distribution of CAT C-262T gene polymorphism

| First author | # | Ethnicity        | Cancer Type              | Case |     |     | Control |      |      | HWE |
|--------------|---|------------------|--------------------------|------|-----|-----|---------|------|------|-----|
|              |   |                  |                          | CC   | CT  | TT  | CC      | CT   | TT   |     |
| Ahn          |   | Caucasian        | Breast cancer            | 614  | 349 | 45  | 679     | 335  | 42   | Yes |
| Aynali       |   | Caucasian        | Laryngeal cancer         | 13   | 10  | 2   | 12      | 11   | 0    | Yes |
| Banescu      |   | Caucasian        | CML                      | 105  | 49  | 14  | 168     | 132  | 21   | Yes |
| Bhatti       | 1 | Caucasian        | Glioblastoma multiforme  |      | 132 | 186 |         | 186  | 249  | NA  |
| Bhatti       | 2 | Caucasian        | Meningioma               |      | 65  | 85  |         | 186  | 249  | NA  |
| Bhatti       | 3 | Caucasian        | Glioblastoma multiforme  |      | 46  | 72  |         | 186  | 249  | NA  |
| Castaldo     |   | Caucasian        | Cervical cancer          | 58   | 25  | 36  | 65      | 27   | 14   | No  |
| Cebrian      |   | Caucasian        | Breast cancer            | 1351 | 707 | 113 | 1362    | 787  | 113  | Yes |
| Cheng        |   | Mixed            | Prostate cancer          | 69   |     | 33  | 450     |      | 276  | NA  |
| Choi         | 1 | Caucasian        | Prostate cancer          | 281  | 157 | 25  | 732     | 445  | 56   | Yes |
| Choi         | 2 | African-American | Prostate cancer          | 24   | 3   | 0   | 109     | 11   | 0    | Yes |
| Ding         |   | Asian            | Prostate cancer          | 1316 | 99  | 2   | 940     | 67   | 1    | Yes |
| Ezzikouri    |   | Caucasian        | Hepatocellular carcinoma | 76   | 14  | 6   | 173     | 45   | 4    | Yes |
| Farawela     |   | Caucasian        | NHL                      | 26   | 49  | 25  | 28      | 53   | 19   | Yes |
| Funke        |   | Caucasian        | Colorectal Cancer        | 374  | 235 | 23  | 348     | 231  | 26   | Yes |
| Geybels      |   | Caucasian        | Prostate cancer          | 887  | 539 | 103 | 15794   | 8108 | 1282 | No  |
| He           | 1 | Caucasian        | BCC                      | 161  | 97  | 12  | 512     | 252  | 32   | Yes |
| He           | 2 | Caucasian        | Melanoma                 | 129  | 75  | 7   | 512     | 252  | 32   | Yes |
| He           | 3 | Caucasian        | SCC                      | 160  | 96  | 10  | 512     | 252  | 32   | Yes |
| Ho           |   | Asian            | Lung cancer              | 209  | 19  | 2   | 217     | 23   | 0    | Yes |
| Kakkoura     |   | Caucasian        | Breast cancer            | 609  | 369 | 79  | 671     | 399  | 71   | Yes |
| Karunasinghe |   | Caucasian        | Prostate cancer          | 144  | 99  | 15  | 258     | 160  | 16   | Yes |
| Li           |   | Caucasian        | Breast cancer            | 295  | 176 | 26  | 303     | 167  | 23   | Yes |

|           |   |           |                          |     |     |    |     |     |    |     |
|-----------|---|-----------|--------------------------|-----|-----|----|-----|-----|----|-----|
| Lightfoot |   | Caucasian | NHL                      | 554 | 298 | 57 | 867 | 498 | 72 | Yes |
| Liu       |   | Asian     | Hepatocellular carcinoma | 239 | 27  | 0  | 223 | 24  | 1  | Yes |
| Quick     | 1 | Mixed     | Breast cancer            | 34  | 13  | 0  | 97  | 10  | 1  | Yes |
| Quick     | 2 | Caucasian | Breast cancer            | 345 | 197 | 27 | 598 | 333 | 43 | Yes |
| Rajaraman | 1 | Mixed     | Acousticneuroma          | 43  | 17  | 3  | 251 | 164 | 23 | Yes |
| Rajaraman | 2 | Mixed     | Glioma                   | 195 | 124 | 11 | 251 | 164 | 23 | Yes |
| Rajaraman | 3 | Mixed     | Meningioma               | 73  | 39  | 8  | 251 | 164 | 23 | Yes |
| Saadat    |   | Caucasian | Breast cancer            | 261 | 129 | 17 | 240 | 132 | 23 | Yes |
| Su        |   | Asian     | Hepatocellular carcinoma | 365 | 34  | 1  | 432 | 47  | 1  | Yes |
| Tang      |   | Mixed     | Pancreatic cancer        | 349 | 174 | 28 | 366 | 207 | 29 | Yes |
| Tefik     |   | Caucasian | Prostate cancer          | 58  | 64  | 33 | 107 | 68  | 20 | Yes |
| Tsai      |   | Asian     | Breast cancer            | 225 | 35  | 0  | 202 | 22  | 0  | Yes |

\* number of data separately reported by articles.

HWE: Hardy-Weinberg equilibrium; CML: Chronic myeloid leukemia; NHL=non-Hodgkin lymphoma; BCC: Basal cell carcinoma; SCC: Squamous cell carcinoma.

Supplementary Table.2 The extracted data of survival analysis

| Model              | Studies      | Year | Ethnicity | Cancer Type              | HR(95%CI)        |
|--------------------|--------------|------|-----------|--------------------------|------------------|
| Dominant model     | Belotte      | 2015 | Mixed     | Ovarian Cancer           | 3.69(1.15-11.84) |
|                    | Koistinen    | 2006 | Caucasian | AML                      | 0.80(0.50-1.50)  |
|                    | Nahon        | 2009 | Caucasian | Hepatocellular Carcinoma | 1.40(0.80-2.20)  |
| Recessive model    | Ambrosone    | 2005 | Caucasian | Breast Cancer            | 0.50(0.12-2.00)  |
|                    | Koistinen    | 2006 | Caucasian | AML                      | 1.10(0.50-2.60)  |
| Homozygote model   | Ambrosone    | 2005 | Caucasian | Breast Cancer            | 0.49(0.12-2.02)  |
|                    | Funke        | 2009 | Caucasian | Rectal Cancer            | 0.58(0.13-2.71)  |
|                    | Geybels      | 2014 | Caucasian | Prostate Cancer          | 1.38(0.97-1.97)  |
|                    | Van Blarigan | 2014 | Caucasian | Prostate Cancer          | 0.66(0.32-1.35)  |
|                    | Koistinen    | 2006 | Caucasian | AML                      | 0.90(0.40-2.40)  |
|                    | Udler        | 2007 | Caucasian | Breast Cancer            | 0.90(0.53-1.52)  |
|                    | Ambrosone    | 2005 | Caucasian | Breast Cancer            | 1.00(0.62-1.61)  |
| Heterozygote model | Funke        | 2009 | Caucasian | Rectal Cancer            | 1.37(0.65-2.87)  |
|                    | Geybels      | 2014 | Caucasian | Prostate Cancer          | 1.15(0.96-1.36)  |
|                    | Van Blarigan | 2014 | Caucasian | Prostate Cancer          | 1.10(0.83-1.47)  |
|                    | Koistinen    | 2006 | Caucasian | AML                      | 0.70(0.40-1.30)  |
|                    | Udler        | 2007 | Caucasian | Breast Cancer            | 0.96(0.76-1.22)  |
|                    | Funke        | 2009 | Caucasian | Rectal Cancer            | 1.16(0.58-2.30)  |
|                    | Geybels      | 2014 | Caucasian | Prostate Cancer          | 1.16(1.01-1.33)  |
| Allelic model      | Van Blarigan | 2014 | Caucasian | Prostate Cancer          | 0.97(0.77-1.21)  |
|                    | Udler        | 2007 | Caucasian | Breast Cancer            | 0.96(0.79-1.16)  |

AML: Acute myeloid leukemia
